1 Quantification of Brain Functional Connectivity  
2 Deviations in Individuals: A Scoping Review of  
3 Functional MRI Studies

4 Artur Toloknieiev<sup>\*1</sup>, Dmytro Voitsekhivskyi<sup>1,2</sup>, Hlib Kholodkov<sup>1,3</sup>,  
5 Roman Lvovich<sup>1,4</sup>, Petro Matiushko<sup>5</sup>, Daria Rekretiuk<sup>3</sup>, Andrii  
6 Dikhtiar<sup>3</sup>, Antonii Viter<sup>3</sup>, Volodymyr Pokras<sup>3</sup>, Stephan  
7 Wunderlich<sup>1</sup>, and Sophia Stoecklein<sup>†1</sup>

8 <sup>1</sup>Department of Radiology, University Hospital, LMU Munich,  
9 Munich, Germany

10 <sup>2</sup>Munich School of Management, LMU Munich, Munich, Germany

11 <sup>3</sup>School of Computation, Information and Technology, Technical  
12 University of Munich, Munich, Germany

13 <sup>4</sup>Faculty of Electrical Engineering and Information Technology,  
14 Technical University of Munich, Munich, Germany

15 <sup>5</sup>Faculty of Mathematics, Computer Science and Statistics, LMU  
16 Munich, Munich, Germany

17 December 2024

18

## Abstract

19

20

21

22

23

24

25

26

27

28

29

30

Functional connectivity magnetic resonance imaging (fcMRI) is a well-established technique for studying brain networks in both healthy and diseased individuals. However, no fcMRI-based biomarker has yet achieved clinical relevance. To establish better understanding of the state of the art in quantifying abnormal connectivity in comparison to a reference distribution, for potential use in individual patients, we have conducted a scoping review over 5672 entries from the last 10 years. We have located five publications proposing methods of abnormal connectivity quantification, reported these methods and formalized them. We also illustrated the emerging trends and technical innovations in fcMRI research that may facilitate development of individualized fcMRI-based abnormal connectivity metrics.

31

## 1 Introduction

32

33

34

35

36

37

38

39

40

41

42

Functional connectivity magnetic resonance imaging (fcMRI), first used for connectivity analysis in humans by Biswal et al. [1] and based on the blood oxygen level dependent (BOLD) signal [2, 3, 4], is widely regarded as a valuable imaging method for the inquiry into connectivity in human [5, 6] and non-human [7] brain research alike. With the scientific community increasingly reconceptualizing neurodegenerative [8, 9], psychiatric [10] and neuro-oncological [11, 12, 13] disorders as “network disorders”, fcMRI-based biomarkers that quantify abnormal connectivity in relation to the distribution in a healthy reference sample may pave a way for a connectivity metrics suited for validation and application in clinical diagnostics.

To date, no fcMRI biomarker has achieved clinical relevance. This can be

---

\*Corresponding author: [toloknieiev.artur@campus.lmu.de](mailto:toloknieiev.artur@campus.lmu.de)

†Corresponding author: [sophia.stoecklein@med.uni-muenchen.de](mailto:sophia.stoecklein@med.uni-muenchen.de)

43 linked to two major challenges: (1) limited interpretability of the acquired sig-  
44 nal in consequence of intra-subject variability and device- and procedure-related  
45 confounds [14, 15, 16] and (2) a lack of well-established and readily accessible ref-  
46 erence values for functional connectivity in individuals despite available datasets  
47 (e.g. Human Connectome Project [52] and 1000connectomes [17]). Alleviating  
48 these issues through systematic use of reference samples and normative model-  
49 ing may permit consistent data interpretation and pave the way for an fcMRI  
50 biomarker accessible enough for potential incorporation into diagnostic practice.

51 In light of the potential benefits of establishing such a normative model  
52 for fcMRI, and considering the successful biomarker normalization attempts in  
53 other brain imaging modalities [18, 19, 20], two assertions can be made.

54 Firstly, there exists an apparent unmet medical need for validated and clin-  
55 ically implemented fcMRI-based abnormality metrics that satisfy the criteria of  
56 relationality and countability. Herein, a relational metric may be defined as a  
57 metric that relies on a control cohort sufficiently representative of the target in-  
58 dividual, allowing to establish a normative model of connectivity that compares  
59 a given individual to a distribution of controls and quantifies the discrepancy,  
60 while a countable metric may be defined as an interval or rational metric that  
61 can be used as grounds for grading or comparison.

62 Secondly, there is minimal study coverage pertaining to the introduction  
63 and validation of such metrics, which limits current insight into individualized  
64 abnormality detection in functional connectivity.

65 An initial step toward addressing the question of normative modelling in  
66 fcMRI consists in a scoping review of fcMRI-based metrics of connectivity ab-  
67 normality, the results of which we present here. Within the scope of this paper,  
68 we review and analyze the fcMRI abnormality metrics yielded by our search,  
69 explore the degree of their refinement, and determine their readiness for clinical

70 validation. Moreover, we discuss the need of moving beyond group comparison  
71 and towards quantitative fcMRI anomaly metrics for application in individual  
72 patients. We also elucidate emerging trends and technical innovations in fcMRI  
73 research that may facilitate development of relational fcMRI-based abnormality  
74 metrics.

## 75 **2 Methods**

### 76 **2.1 Overall Protocol**

77 We have conducted our review in adherence to the general framework of scoping  
78 reviews proposed by Arksey and O'Malley [21] and refined by Levac et al. [22].  
79 We reported our results in compliance with the Preferred Reporting Items for  
80 Systematic reviews and Meta-Analyses (PRISMA) extension for scoping reviews  
81 (PRISMA-ScR) [23]. The PRISMA-ScR compliance checklist can be accessed  
82 in the Supplementary Materials.

### 83 **2.2 Review Objectives**

84 Within the scope of this review, we intended to determine (1) whether there  
85 exist metrics to quantify the deviation of functional connectivity in an individual  
86 patient from a reference population, (2) whether they are validated to guarantee  
87 sufficient technology readiness and clinical utility and (3) whether they satisfy  
88 the criteria of relationality and countability outlined in the introduction.

89 In pursuit of this objective, we have reviewed the state-of-the-art (SOTA)  
90 in fcMRI connectivity abnormality detection, analyzed the results, formalized  
91 them, and reported our findings.

## 92 **2.3 Information Sources, Search Strategy, Data Acquisi-** 93 **tion and Handling**

94 We have leveraged the Google Scholar database for our search. We set the query  
95 year range at the years 2014-2024 and employed Publish or Perish 8.10.4612.8838  
96 [24] to automate our query. We searched in 1-year batches to yield the most  
97 entries and circumvent the internal limit of 1000 entries per query. We input  
98 the following search request: "fcMRI connectivity connectome abnormality de-  
99 tection anomaly map deviation individual reference metric."

100 All data was aggregated using pandas 2.1.1 [25] and NumPy 1.23.5 [26],  
101 exported as comma-separated values, and uploaded for subsequent group review  
102 on a secure team space in Notion [27]. Using Notion's integrated tools and  
103 functions, we removed damaged or empty entries. The remaining entries were  
104 subjected to screening and eligibility assessment (see below).

## 105 **2.4 Study Screening and Selection**

106 We employed a 2-phase screening and eligibility selection strategy. During the  
107 screening phase, we excluded sources that (1) did not report research based on  
108 fMRI or did not use BOLD signal, (2) reported experiments on participants  
109 under 18 years of age, (3) did not have a healthy reference cohort against which  
110 the patients would be gauged, (4) were reviews, (5) were preprints, (6) were  
111 book chapters, (7) did not report research on resting-state fcMRI, (8) were  
112 not accessible for full text, (9) reported research on data acquired with a field  
113 strength under 3.0 T, (10) were theses or dissertations, (11) were meta-analyses,  
114 (12) reported research conducted on non-human data, (13) were citation records,  
115 (14) were abstract almanacs or miscellaneous publications, (15) were conference  
116 papers, (16) were study protocols or (17) were not in English.

117 Eligibility assessment phase consisted in elimination of articles that did not

118 report metrics that satisfy the criteria of relationality and countability outlined  
119 in the introduction. Eligibility assessment relied on an in-depth inspection of  
120 the "Methods" section and a deeper examination of other paper sections in cases  
121 where it was necessary. Edge cases were resolved by reviewer consensus.

## 122 **2.5 Study Analysis**

123 The sources which passed screening and selection were fully studied. Subse-  
124 quently, we extracted the metric computation methods reported by the respec-  
125 tive authors, described them, and formalized them. To explore the degree of  
126 their refinement, state of validation, and level of applicability in a clinical set-  
127 ting, we chose to follow the citations of the articles in question (for better nar-  
128 ration consistency and text legibility, these searches will be reported within the  
129 results section). Subsequently, we integrated these findings to yield our state-  
130 ments. We additionally assigned to every metric a Technology Readiness Level  
131 (TRL) as specified by ISO 16290:2013 [28] in the edition of EU Commission  
132 Decision C(2017)7124 [29], elucidated for fMRI-based abnormality detection  
133 applications as per Table 1.

## 134 **3 Results**

### 135 **3.1 Query Results**

136 Our query cumulatively returned 5696 entries, 5672 of them valid (non-empty,  
137 not damaged or fragmentary) entries. After screening, 4964 sources were ex-  
138 cluded (Fig. 1), while 708 sources were deemed eligible for selection. Only 5  
139 passed selection and were subjected to a full-depth analysis. A PRISMA flow  
140 diagram is available in Fig. 2.

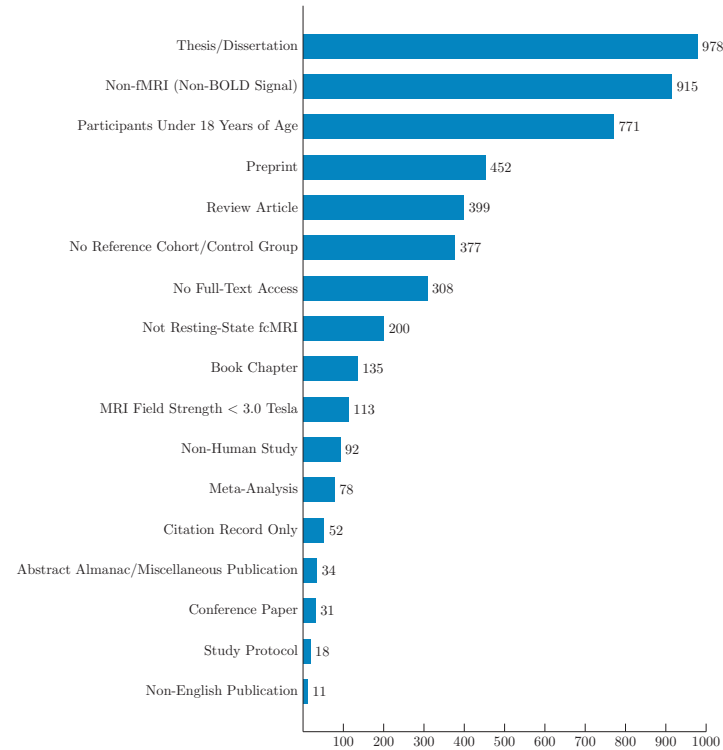

Figure 1: Entries eliminated during Screening phase. In total, we have excluded 4964 entries, of them entries on 978 theses and dissertations, 915 non-fMRI studies, 771 studies on patients under 18 years of age, 452 preprints, 399 reviews, 377 studies without a healthy reference cohort, 308 articles without accessible full-text, 200 non-resting-state fMRI studies, 135 book chapters, 113 studies conducted on data acquired with a field strength under 3.0 Tesla, 92 studies conducted on non-human data, 78 meta-analyses, 52 citation records, 34 abstract almanacs or other publications, 31 conference papers, 18 protocol papers and 11 publications in a language other than English.

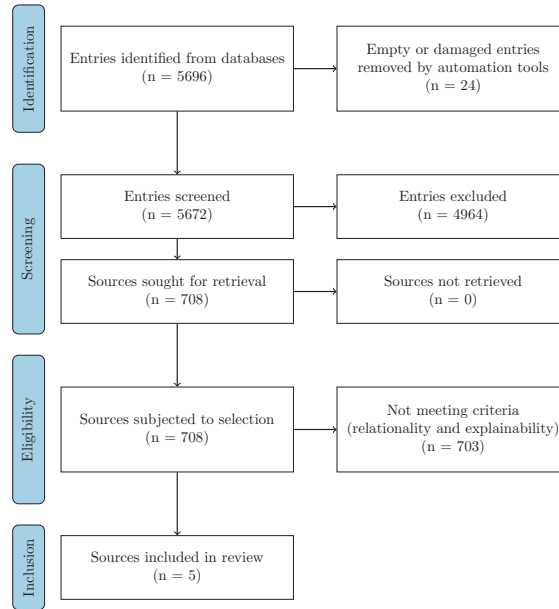

Figure 2: PRISMA flow diagram of review process. In the screening phase we have eliminated 4964 entries of sources (see Section 2.4 and Fig. 1), retrieved 708 sources for review eligibility assessment and applied to them the criteria of relationality and countability outlined previously. Notably, only five sources could be deemed eligible for inclusion into the review.



Table 1: Technology Readiness Levels (TRL) for fMRI-based abnormality detection

| TRL   | Description                                        | Elucidation for fMRI domain                                                                                                                                     |
|-------|----------------------------------------------------|-----------------------------------------------------------------------------------------------------------------------------------------------------------------|
| TRL 1 | Basic Principles Observed                          | Study of BOLD signals and derived functional connectivity metrics at the region of interest (ROI) level; understanding hemodynamic responses in individual ROIs |
| TRL 2 | Technology Concept Formulated                      | Conceptualizing ROI-wise detection methods; formulating hypotheses on ROI abnormalities                                                                         |
| TRL 3 | Proof-of-Concept Demonstrated                      | Simulations with synthetic data or real data with niche cases; initial testing of algorithms in exploratory contexts                                            |
| TRL 4 | Component Validation in Lab Environment            | Testing on controlled datasets; refining ROI-wise analysis techniques                                                                                           |
| TRL 5 | Component Validation in Relevant Environment       | Application to small-scale real-world human data; adjusting for real-world variability; limited longitudinal studies                                            |
| TRL 6 | Prototype Demonstration in Relevant Environment    | Pilot studies with clinical data; collaborating with clinicians for feedback; extensive longitudinal studies                                                    |
| TRL 7 | Prototype Demonstration in Operational Environment | Deployment in clinical settings; integration with existing imaging systems; experimental clinical decision support                                              |
| TRL 8 | System Qualified Through Test and Demonstration    | Conducting clinical trials; initiating regulatory compliance processes; system/metric validated in clinical contexts for decision support                       |
| TRL 9 | Actual System Proven in Operational Environment    | Widespread clinical adoption; ongoing monitoring and support; ready for long-term integration into clinical guideline                                           |

## 141 3.2 State of the Art and its Aspects

### 142 3.2.1 The Nenning Index

143 Nenning et al. [30] introduced a voxel-level connectivity abnormality metric in  
144 their 2020 glioblastoma paper. Briefly, it is computed as follows: (1) voxel-  
145 wise connectivity matrices for both patients and controls (80 control subjects)  
146 are built using z-scored Pearson correlations; (2) element-wise average of control  
147 population connectivity matrices is computed to yield a group average "normal"  
148 connectivity matrix; (3) a vector of voxel-wise differences is computed between  
149 the patients and group average as row-wise cosine similarity; (4) for every voxel  
150 in controls' connectivity matrices and the group average matrix, cosine similar-  
151 ities are computed to yield voxel-wise distribution; from that distribution, the  
152 median and mean absolute deviation (MAD) are computed (the "voxel mean"  
153 and "voxel MAD" respectively); (5) for every patient and for every patient  
154 voxel's cosine similarity, an abnormality score is computed as the difference of  
155 cosine similarity and voxel mean, subsequently divided by the voxel MAD.

156 Analytically, this can be summarized as follows:

$$A_v^{(p)} = \frac{\frac{\mathbf{C}_{v,*}^{(p)} \cdot \bar{\mathbf{C}}_{v,*}}{\|\mathbf{C}_{v,*}^{(p)}\| \|\bar{\mathbf{C}}_{v,*}\|} - \text{median} \left( \left\{ \frac{\mathbf{C}_{v,*}^{(c_i)} \cdot \bar{\mathbf{C}}_{v,*}}{\|\mathbf{C}_{v,*}^{(c_i)}\| \|\bar{\mathbf{C}}_{v,*}\|} \right\}_{i=1}^N \right)}{\text{MAD} \left( \left\{ \frac{\mathbf{C}_{v,*}^{(c_i)} \cdot \bar{\mathbf{C}}_{v,*}}{\|\mathbf{C}_{v,*}^{(c_i)}\| \|\bar{\mathbf{C}}_{v,*}\|} \right\}_{i=1}^N \right)} \quad (1)$$

157 where  $\mathbf{C}_{v,*}^{(p)}$  is the connectivity vector of voxel  $v$  for patient  $p$ ,  $\mathbf{C}_{v,*}^{(c_i)}$  is the connec-  
158 tivity vector of voxel  $v$  for control subject  $c_i$ , with  $i = 1, 2, \dots, N$  and  $N = 80$   
159 being the number of control subjects,  $\bar{\mathbf{C}}_{v,*}$  is the average connectivity vector of  
160 voxel  $v$  across all control subjects,  $\|\cdot\|$  denotes the Euclidean norm of a vector,  $\cdot$   
161 represents the dot product between two vectors,  $\text{median}(\cdot)$  computes the median

162 of a set of values and  $MAD(\cdot)$  computes the median absolute deviation of a set  
163 of values.

164 It is important to mention that Nenning’s team focused on reporting ab-  
165 normality in non-infiltrated regions but pointed out that the inclusion of tumor  
166 infiltrated regions did not significantly alter the overall connectivity signature.  
167 Additionally, they demonstrate that in glioblastoma, functional proximity to the  
168 tumor tends to be reflected stronger than structural proximity in coefficients  
169 derived from fcMRI signal, while visual, somatomotor, and limbic networks  
170 tend to exhibit anomaly coefficients more evenly informed by both spatial and  
171 functional distance alike. Finally, Nenning’s team demonstrate precedence of  
172 network anomalies before tumor recurrence, highlighting a potential prognostic  
173 capacity for abnormality index computation.

174 PubMed citation check revealed no further studies employing this index in  
175 their computations; however, the longitudinal character of the study in focus  
176 supports the assignment to this index of a TRL 5 out of 9.

### 177 **3.2.2 The Dysconnectivity Index**

178 Stoecklein and Liu [31] present another voxel-level connectivity abnormality  
179 metric in their publication on gliomas. It is computed as follows: (1) voxel-  
180 wise connectivity matrices are built for both patients and controls (1000 control  
181 subjects) using Pearson correlations; (2) for every control subject connectivity  
182 matrix, every voxel position in the matrix, and every element in the voxel, a  
183 distribution of connectivity coefficients is built; (3) the distribution’s mean and  
184 standard deviation are computed to yield respective elements of the mean and  
185 standard deviation vectors; (4) for every patient connectivity matrix, every voxel  
186 position in the matrix, and every element in the voxel, a z-score is computed for  
187 using the elements of the mean and standard deviation vectors computed before  
188 (i.e., for  $i$ -th element in the patient’s voxel, respective  $i$ -th element of the mean

189 and standard deviation vector is used) to yield a vector of z-scores; (5) a sum  
190 of z-scores higher than a specific threshold is computed to yield the voxel-level  
191 "abnormality coefficient."

192 Analytically, for the voxel at the position  $i$  this can be summarized as follows:

$$\text{Abnormality Coefficient} = \sum_j \mathbb{I} \left( \frac{P^{ij} - \left( \frac{1}{N} \sum_{c=1}^N C_c^{ij} \right)}{\sqrt{\frac{1}{N} \sum_{c=1}^N \left( C_c^{ij} - \frac{1}{N} \sum_{c=1}^N C_c^{ij} \right)^2}} > T \right) \quad (2)$$

193 where  $P^{ij}$  is the connectivity coefficient at voxel position  $i, j$  for the patient,  
194  $C_c^{ij}$  is the connectivity coefficient at voxel position  $i, j$  for control subject  $c$ ,  $N$   
195 is the number of control subjects,  $T$  is the specific threshold, and  $\mathbb{I}(\cdot)$  is the  
196 indicator function, which evaluates to 1 if the condition is true and 0 otherwise.

197 The authors have conducted computations for the entire brain (without tu-  
198 mor mask exclusion) and demonstrated not only that tumor sites can be cap-  
199 tured by their index, but that abnormality can be detected far beyond the lesion  
200 itself, even in the contralateral hemisphere, particularly in high grade gliomas.  
201 They have also shown that, in glioma, their abnormality index correlates with  
202 neurocognitive performance, WHO grade, PET metabolic data, and IDH muta-  
203 tion status. Additionally, the authors hypothesized that abnormal connectivity  
204 may not only originate from tumor functional or structural proximity but also  
205 indicate sub-clinical tumor cell infiltration and speculated that functional dis-  
206 ruption also indicates possible tumor cell infiltration.

207 PubMed citation check revealed two studies based on this index. In the  
208 first publication [32], the authors demonstrated that their abnormality index  
209 (in more recent sources referred to as DCI - the "dysconnectivity index") can  
210 be employed to assess immune effector cell-associated neurotoxicity syndrome

211 (ICANS) in patients under CAR-T therapy and hypothesized that it may be  
212 used to objectify damage to functional networks in encephalopathies; further-  
213 more, the authors stated that their index may provide an imaging correlate to  
214 trace and possibly predict neurotoxic side-effects of oncologic treatment. In the  
215 second publication [33], the authors show a direct association between the DCI  
216 and the perifocal edema volume in meningiomas, as well as neurocognitive per-  
217 formance (i.e., higher DCI implies larger edema and more degraded cognition).

218 The sizable body of knowledge amassed in relation to this index, as well as  
219 validation for different diseases of the human brain and their sequelae, allows  
220 us to assign to this index a TRL of 6 out of 9.

### 221 **3.2.3 The Doucet Normative Person-Based Similarity Index**

222 In their publication, Doucet et al. [34] report the normative person-based simi-  
223 larity index (nPBSI). Computed from both functional connectivity and cortical  
224 morphometry per aspect, their index explicitly seeks to make a patient's condi-  
225 tion relative to a set control population (93 control subjects). Doucet's group  
226 presents four indices for which clinical, genetic, demographic, and environmental  
227 correlates have been described - normative cortical thickness PBSI (nPBSI-CT),  
228 normative subcortical volume PBSI (nPBSI-SV), normative module cohesion  
229 PBSI (nPBSI-MC) and normative module integrations (nPBSI-MI).

230 Within the scope of this review, our attention was focused on the fMRI-  
231 based module cohesion and module integration metrics, computed as follows: (1)  
232 the patient's brain is parcellated into default mode, central executive, salience,  
233 sensorimotor, and visual networks; (2) within-module connectivity is repre-  
234 sented as the average value of a voxel wise z-transformed Pearson correlation  
235 coefficient between all of the module's voxel pairs and used to build a pa-  
236 tient's module cohesion profile, encoded as a module cohesion feature vector;  
237 (3) between-module connectivity is represented as z-transformed Pearson cor-

238 relation coefficients of the modules' averaged time series and used to build a  
239 patient's module integrations profile, encoded as a module integrations feature  
240 vector, and finally, (4) the nPBSI-MC or nPBSI-MI are computed as averaged  
241 Spearman correlations between the patient and the healthy controls' respective  
242 (module cohesion or module integrations) feature vectors.

243 Analytically, for the patient  $p$  this can be summarized as follows:

$$\text{nPBSI-MC} = \frac{1}{|H|} \sum_{h \in H} \rho \left( \left[ \frac{1}{K_i} \sum_{(v_p, v_q) \in M_i} z \left( r_{v_p v_q}^{(p)} \right) \right]_{i=1}^N, \left[ \frac{1}{K_i} \sum_{(v_p, v_q) \in M_i} z \left( r_{v_p v_q}^{(h)} \right) \right]_{i=1}^N \right) \quad (3)$$

$$\text{nPBSI-MI} = \frac{1}{|H|} \sum_{h \in H} \rho \left( \left[ z \left( r_{M_i M_j}^{(p)} \right) \right]_{i \neq j}, \left[ z \left( r_{M_i M_j}^{(h)} \right) \right]_{i \neq j} \right), \quad (4)$$

245 where  $N$  represents the number of brain modules (default mode, central  
246 executive, salience, sensorimotor, and visual networks),  $M_i$  is the set of voxels  
247 in module  $i$ ,  $K_i$  is the number of voxel pairs in module  $i$ ,  $r_{v_p v_q}^{(p)}$  is the Pearson  
248 correlation coefficient between voxels  $v_p$  and  $v_q$  for the patient  $p$ ,  $r_{v_p v_q}^{(h)}$  is the  
249 Pearson correlation coefficient between voxels  $v_p$  and  $v_q$  for a healthy control  
250  $h$ ,  $r_{M_i M_j}^{(p)}$  is the Pearson correlation coefficient between the average time series  
251 of modules  $i$  and  $j$  for the patient  $p$ ,  $r_{M_i M_j}^{(h)}$  is the same for a healthy control  
252  $h$ ,  $z(r) = \frac{1}{2} \ln \left( \frac{1+r}{1-r} \right)$  is the Fisher z-transformation,  $\rho$  denotes the Spearman  
253 correlation coefficient,  $H$  is the set of healthy controls and  $|H|$  is the number of  
254 healthy controls.

255 PubMed citation check revealed no studies employing the normative index  
256 from this publication in their computations of functional connectivity met-  
257 rics. The closest possible match [35] relied on computing both the within- and  
258 between-network connectivity but did not compute the nPBSI itself. Modest  
259 validation for bipolar disorder and lack of nPBSI validation for other disorders  
260 justifies the assignment to this metric of a TRL 4 out of 9.

### 261 3.2.4 The Network Topography Spatial Similarity Index

262 Silvestri and Corbetta present a spatial similarity index (SSI) for network to-  
263 pographies derived from independent component analysis (ICA) in their 2022  
264 publication on gliomas [36]. Briefly, it is computed as follows: (1) rs-fcMRI  
265 data of the control population (308 individuals) are subjected to a group ICA  
266 (G-ICA) to yield group-level template independent component (IC) maps for  
267 ten functional networks (specifically, visual, sensorimotor, auditory, cingulo-  
268 opercular, dorsal attention, fronto-parietal, default mode, cognitive control,  
269 frontal and language networks); (2) the group-level template IC maps are used  
270 as spatial constraints for group information-guided ICA (GIG-ICA) of both con-  
271 trols and patients (24 individuals) to produce individual-specific, single-subject  
272 level IC maps; (3) for each IC in subject, a cosine similarity is computed be-  
273 tween a single-subject IC map and a template IC map thresholded at a value of  
274 1 and is yielded as the network topography spatial similarity index.

275 Analytically, this can be expressed as follows:

$$SSI_{IC} = \frac{\left( \text{GIG-ICA} (D_s; \{T_k\}_{k=1}^{10})_j \right) \cdot (\text{Threshold}_1(T_j))}{\left\| \text{GIG-ICA} (D_s; \{T_k\}_{k=1}^{10})_j \right\| \cdot \left\| \text{Threshold}_1(T_j) \right\|} \quad (5)$$

276 where  $SSI_{IC}$  is the spatial similarity index for a given independent compo-  
277 nent,  $D = \{D_i\}_{i=1}^{308}$  represents the rs-fMRI data of the control population,  
278  $T = \text{G-ICA}(D) = \{T_j\}_{j=1}^{10}$  are the group-level template IC maps for the ten  
279 functional networks obtained from group ICA,  $D_s$  is the rs-fMRI data of sub-  
280 ject  $s$ ,  $\text{GIG-ICA}(D_s; \{T_k\}_{k=1}^{10})_j$  produces the single-subject IC map  $S_{s,j}$  for sub-  
281 ject  $s$  and component  $j$  using the group-level templates as spatial constraints,  
282  $\text{Threshold}_1(T_j)$  denotes the template IC map  $T_j$  thresholded at a value of 1,  
283 the numerator  $(\cdot)$  represents the dot product between the two vectors and the  
284 denominator  $(\|\cdot\|)$  represents the Euclidean norm (magnitude) of the vectors.

285 The team around Silvestri and Corbetta reported testing structural and  
286 functional proximity of their index to the tumor sites, describing partial over-  
287 lap of index abnormalities and glioma-infiltrated areas and highlighting index  
288 abnormalities in non-infiltrated areas. They also analyzed changes in network  
289 topography scores and neuropsychological performance and were able to capture  
290 a statistically relevant relationship between the SSI and the attention domain.  
291 PubMed citation check revealed no studies employing this normative index in  
292 their computations of functional connectivity metrics. Modest validation for  
293 gliomas and lack of validation for other disorders justifies the assignment to this  
294 metric of a TRL 4 out of 9.

### 295 **3.2.5 The Morgan Network Topology Method**

296 Morgan et al. present various metrics and indices in their publication on the role  
297 of anterior hippocampus in mesial temporal lobe epilepsy (mTLE) [37]. Their  
298 computations rely on multi-modal data and operate within four topologies: the  
299 streamline length ( $T_{LEN}$ ), structural connectivity ( $T_{SC}$ ), functional connectiv-  
300 ity ( $T_{FC}$ ) and resting-state network topology ( $T_{RSN}$ ). Within the scope of our  
301 review, we will focus on the functional connectivity topology and its respec-  
302 tive distance index, as no similar index has been reported for the resting-state  
303 network topology.

304 Briefly, it is computed as follows: (1) functional connectivity maps are built  
305 for controls (70 individuals) and patients (40 individuals, of them 29 with right  
306 mTLE and 11 with left mTLE) from  $z$ -transformed functional connectivity  
307 matrices through age regression and subsequent averaging of signal over 109  
308 anatomical ROIs; (2) a topology is built from the functional connectivity maps  
309 by selecting 55 ROIs of a single hemisphere for patients and controls; (3) a seed  
310 vector is used to slice anterior hippocampal connectivity from the topology into  
311 a connectivity vector for both patients and controls; (4) the connectivity vec-



312 tor is stratified along connectivity intensity into "bins" to yield their respective  
313 connectivity vectors of  $k$  elements for both patients and controls; (5) for patient  
314 and bin, the Mahalanobis distance between the patient's bin connectivity vector  
315 and the mean of controls' bin connectivity vectors is computed and yielded as  
316 connectivity deviation metric.

317 Analytically, this can be summarized as follows:

$$MD_{i,b} = \sqrt{(\phi_{i,b} - \mu_b)^\top \Sigma_b^{-1} (\phi_{i,b} - \mu_b)} \quad (6)$$

318 with patient's connectivity vector in bin, controls' mean vector in bin and con-  
319 trols' covariance matrix in bin as, respectively,

$$\phi_{i,b} = B_b(RS(M_i)) \quad (7)$$

320

$$\mu_b = \frac{1}{N_c} \sum_{j=1}^{N_c} B_b(RS(M_j)) \quad (8)$$

321 and

$$\Sigma_b = \frac{1}{N_c - 1} \sum_{j=1}^{N_c} (B_b(RS(M_j)) - \mu_b) (B_b(RS(M_j)) - \mu_b)^\top \quad (9)$$

322 where  $M_i$  is a functional connectivity matrix (size  $109 \times 109$ ) for individual  
323  $i$ ,  $S(M_i)$  denotes a selection operator extracting a  $55 \times 55$  hemisphere-specific  
324 submatrix from  $M_i$ ,  $R$  is a seed vector (size  $1 \times 55$ ) with 1 at the anterior hip-  
325 pocampus position and 0 elsewhere,  $B_b(\cdot)$  symbolizes the binning function that  
326 selects elements belonging to bin  $b$  based on connectivity intensity,  $N_c = 70$  is  
327 the number of control individuals,  $\mu_b$  is the mean vector of controls' connectivity  
328 vectors in bin  $b$  and  $\Sigma_b$  is the covariance matrix of controls' connectivity vectors  
329 in bin  $b$ .

330 PubMed citation check revealed two studies which reported intriguing use of  
331 the logic behind this computational approach. The first publication of interest

332 by Morgan et al. [38] reports use of similar connectivity profiling techniques and  
333 the Mahalanobis distance for outcome prediction in mTLE patients by means of  
334 distance computation between a patient’s connectivity profile and a normative  
335 population of individuals who achieved seizure-free status after mesial temporal  
336 lobe surgery. Notably, the team around Morgan reported sensitivity of 100%  
337 and specificity of 90% for their prediction approach.

338 The second publication by Guerrero-Gonzalez et al. [39] does not pertain to  
339 functional MRI, but describes use of the comparable logic of normative modeling  
340 and Mahalanobis distance computing to quantify abnormality in tractography  
341 of traumatic brain injury patients.

342 The epilepsy-specific focus of Morgan’s distance-based approach limits the  
343 scope of potential use of this metric; however, success of similar computational  
344 approaches in other modalities and remarkable performance of the Mahalanobis  
345 distance-based index in the surgical outcome prediction task support the assign-  
346 ment to this metric of a TRL 5 out of 9.

## 347 **4 Discussion**

### 348 **4.1 Group Comparison Currently Prevails in Studies of** 349 **Abnormal Connectivity**

350 In this scoping review, we have been able to show that, despite the strong  
351 knowledge base to support the concept of neurodegenerative [8, 9], psychiatric  
352 [10] and neuro-oncological [11, 12, 13] as “network disorders”, a metric capable  
353 of evaluating and quantifying large-scale functional brain network disruptions in  
354 individual patients is yet to be developed, validated and made accessible enough  
355 for potential incorporation into diagnostic practice.

356 We also demonstrated that, despite the significant benefits of relational met-

357 rics as integral elements of normative modeling [40], we could only retrieve five  
358 such metrics of functional connectivity deviation that have been proposed within  
359 the last ten years. Of note, in many studies that we evaluated for this review, the  
360 findings and the hypotheses that lead to these findings were built around the as-  
361 piration to illustrate binary differences between patients and healthy controls,  
362 which resulted in reports of metrics being increased or decreased in patients  
363 without a clearly specified relation between the increment of metric and incre-  
364 ment of pathological state. The development of patient-centric fcMRI markers  
365 requires moving beyond group comparison and toward relational metrics based  
366 on normative populations that span variability in demographic and procedural  
367 factors.

## 368 **4.2 Artificial Intelligence and Big Data Emerge as Meth-** 369 **ods in fcMRI Research**

370 The advent of big data and artificial intelligence-based methods in fcMRI re-  
371 search may boost the development of relational connectivity metrics by enhanc-  
372 ing the current computational approaches and data accessibility.

373 The drastic progress in computing technology [41] has made possible the  
374 widespread use of industrial-grade hardware acceleration of previously strictly  
375 linear computing through parallel computing with the help of much more read-  
376 ily accessible graphical processing units (GPUs) [42, 43]. Improved hardware-  
377 software synergy now permits optimization of both speed and efficiency of  
378 data engineering and machine learning, allowing for faster simultaneous read-  
379 /write operations and deeper insight into highly complex multidimensional data.  
380 This is well-manifested by the packages for accelerated Python computing (e.g.  
381 CuPy[44] or Dask [45]), optimized tensor storage solutions (e.g. Zarr [46] or  
382 Xarray [47]), new Neuroimaging Informatics Technology Initiative (NifTI) im-

383 age manipulation modules (e.g. Xibabel [48]) or the advancements in the field  
384 of machine learning (ML) frameworks [49, 50, 51].

385 Simultaneously, high-quality data can be accessed freely by virtue of rec-  
386 ognized cohorts (e.g. Human Connectome Project, Alzheimer’s Disease Neu-  
387 roimaging Initiative or Brain Genomics Superstruct Project [52, 53, 54]) and  
388 open-access data repositories (e.g. OpenNeuro [55]), which permits compila-  
389 tion of harmonized, statistically powerful reference datasets, capturing vari-  
390 ability across demographics and technical parameters. The utility of account-  
391 ing for these factors is well-substantiated by evidence of variables such as age  
392 [56, 57, 58], sex [59, 60] and scan parameters [61, 62] having significant influ-  
393 ence on fcMRI metrics. Therefore, creation of large-scale reference datasets  
394 augmented by technical and demographic parameters may help pave the way  
395 for normative modelling in fcMRI.

396 Moreover, the current rise of deep learning models for operations on fcMRI  
397 data can help streamline previously time-consuming elements of data prepro-  
398 cessing and enrichment, potentially accelerating research on relational fcMRI-  
399 based metrics manifold. This is prominently exemplified by ML breakthroughs  
400 in the area of structural image preprocessing with algorithms such as FastSurfer  
401 [63], a deep learning pipeline for brain segmentation, cortical surface reconstruc-  
402 tion, cortical label mapping and thickness analyses. Similar advancements have  
403 also been reported for affine registration with tools such as SynthMorph [64],  
404 a model that resolves a tensor-to-tensor mapping problem for an image pair,  
405 yielding a compatible spatial transform. Lastly, experimental ML-boosted inte-  
406 grated pipelines for fcMRI image preprocessing (e.g. DeepPrep [65]) have also  
407 been proposed.

408 In summary, the current circumstances create a uniquely favorable setting  
409 for more practical progress on relational fcMRI-based metrics of abnormal con-

410 nectivity.

### 411 **4.3 Limitations**

412 Our search only comprises sources released before mid-May 2024. Addition-  
413 ally, our search terms might not include all relevant publications. In particular,  
414 preprints, theses and dissertations have been excluded as reports that have not  
415 undergone a peer review process. Additionally, not all publications could be  
416 accessed for full text. Furthermore, due to considerably less generalizable dy-  
417 namics of neurobiological development in pediatric and adolescent individuals,  
418 a decision was made not to consider publications that concerned persons under  
419 18 years of age. Finally, if a publication matched more than one exclusion crite-  
420 rion during screening, its exclusion was attributed to a single most prominently  
421 matching criterion in an effort to prevent redundant statistical entries.

## 422 **5 Summary**

423 Patients suffering from neuro-oncological, psychiatric and neurodegenerative  
424 disorders can benefit from individualized detection and quantification of ab-  
425 normal functional connectivity. However, no fcMRI-derived biomarkers have  
426 yet seen widespread adoption in clinical research or practice. Within the scope  
427 of this scoping review, we have asserted both the necessity and the current  
428 absence of a well-established relational and countable metric for abnormal func-  
429 tional connectivity in individuals. We have subsequently leveraged the Google  
430 Scholar database to retrieve sources that matched our search criteria and sub-  
431 jected them to PRISMA-compliant screening and selection to yield items for  
432 subsequent in-depth analysis. We have yielded and demonstrated five currently  
433 reported methods/metrics for relational, normative quantification of abnormal  
434 connectivity and formalized their computation methods. Building upon our

435 results, we have discussed the need of moving beyond group comparison and to-  
436 ward quantitative fcMRI anomaly metrics for application in individual patients  
437 and briefly elucidated the emerging trends and technical innovations in fcMRI  
438 research that may facilitate development of relational metrics of functional con-  
439 nectivity.

## 440 **Acknowledgements**

441 We would like to thank Julia Ruat for her invaluable support in the management  
442 of this project.

## 443 **Funding Information**

444 S.S. received support through the LMU Investment Fund (LMU Excellence  
445 AOST: 865105-7). Funding sources had no role in the design, implementation,  
446 analysis, interpretation, or reporting of this research.

## 447 **Conflict of Interest**

448 The authors have no relevant conflict of interest to declare.

## 449 **Data Availability Statement**

450 Data sharing is not applicable in the context of this publication, as no datasets  
451 were generated or analyzed during this scoping review. The tabular reports of  
452 the included and excluded articles are available from the corresponding authors  
453 upon reasonable request.

## 454 **Code Availability Statement**

455 No novel code was generated during the current study. Minimal scripting was  
456 done to support data aggregation.

## 457 **Inclusion and Ethics Statement**

458 This scoping review concerns peer-reviewed publications and therefore does not  
459 require ethical approval.

## 460 **Author Contributions**

461 A. T. - Conceptualization, Methodology Selection & Implementation, Data Col-  
462 lection, Entry Screening, Source Eligibility Selection, Source Analysis, Formal-  
463 ization & Integration of Findings, Original Draft Preparation, Visualization,  
464 Review and Editing, Project Administration.

465 D. V. - Data Collection, Entry Screening, Source Eligibility Selection, Source  
466 Analysis, Formalization & Integration of Findings, Original Draft Preparation,  
467 Visualization, Review and Editing, Project Administration.

468 H. K. - Data Collection, Entry Screening, Source Eligibility Selection, Source  
469 Analysis, Formalization & Integration of Findings, Original Draft Preparation,  
470 Visualization, Review and Editing, Project Administration.

471 R. L. - Entry Screening, Source Eligibility Selection, Source Analysis, For-  
472 malization & Integration of Findings.

473 P. M. - Entry Screening, Source Eligibility Selection.

474 D. R. - Entry Screening, Source Eligibility Selection.

475 A. D. - Entry Screening.

476 A. V. - Entry Screening.

477 V. P. - Entry Screening.

478 S. W. - Source Eligibility Selection, Source Analysis.

479 S. S. - Conceptualization, Source Analysis, Formalization & Integration of  
480 Findings, Review and Editing, Supervision, Funding Acquisition, Project Ad-  
481 ministration, Resources, Oversight and Approvals.

482 D.V. and H.K. contributed equally to this publication.

483 D.R. and P.M. contributed equally to this publication.

484 A.D. and A.V. contributed equally to this publication.

## 485 References

486 [1] Biswal, B., Yetkin, F. Z., Haughton, V. M., & Hyde, J. S. (1995).  
487 Functional connectivity in the motor cortex of resting human brain us-  
488 ing echo-planar MRI. *Magnetic Resonance in Medicine*, 34(4), 537–541.  
489 <https://doi.org/10.1002/mrm.1910340409>

490 [2] Ogawa, S., Lee, T. M., Kay, A. R., & Tank, D. W. (1990). Brain mag-  
491 netic resonance imaging with contrast dependent on blood oxygenation.  
492 *Proceedings of the National Academy of Sciences*, 87(24), 9868–9872.  
493 <https://doi.org/10.1073/pnas.87.24.9868>

494 [3] Logothetis, N. K. (2003). The underpinnings of the BOLD Functional  
495 Magnetic Resonance Imaging signal. *Journal of Neuroscience*, 23(10),  
496 3963–3971. <https://doi.org/10.1523/jneurosci.23-10-03963.2003>

497 [4] Buxton, R. B., Wong, E. C., & Frank, L. R. (1998). Dynam-  
498 ics of blood flow and oxygenation changes during brain activation:  
499 The balloon model. *Magnetic Resonance in Medicine*, 39(6), 855–864.  
500 <https://doi.org/10.1002/mrm.1910390602>



- 501 [5] Buckner, R. L., Krienen, F. M., & Yeo, B. T. T. (2013). Opportunities and  
502 limitations of intrinsic functional connectivity MRI. *Nature Neuroscience*,  
503 16(7), 832–837. <https://doi.org/10.1038/nn.3423>
- 504 [6] Zhang, J., Kucyi, A., Raya, J., Nielsen, A. N., Nomi, J. S., Damoi-  
505 seaux, J. S., Greene, D. J., Horovitz, S. G., Uddin, L. Q., &  
506 Whitfield-Gabrieli, S. (2021). What have we really learned from func-  
507 tional connectivity in clinical populations? *NeuroImage*, 242, 118466.  
508 <https://doi.org/10.1016/j.neuroimage.2021.118466>
- 509 [7] Pagani, M., Gutierrez-Barragan, D., De Guzman, A. E., Xu, T., & Gozzi,  
510 A. (2023). Mapping and comparing fMRI connectivity networks across  
511 species. *Communications Biology*, 6(1). [https://doi.org/10.1038/s42003-](https://doi.org/10.1038/s42003-023-05629-w)  
512 [023-05629-w](https://doi.org/10.1038/s42003-023-05629-w)
- 513 [8] Franzmeier, N., Dewenter, A., Frontzkowski, L., Dichgans, M., Rubinski,  
514 A., Neitzel, J., Smith, R., Strandberg, O., Ossenkoppele, R., Buerger,  
515 K., Duering, M., Hansson, O., & Ewers, M. (2020). Patient-centered  
516 connectivity-based prediction of tau pathology spread in Alzheimer’s dis-  
517 ease. *Science Advances*, 6(48). <https://doi.org/10.1126/sciadv.abd1327>
- 518 [9] Rauchmann, B., Brendel, M., Franzmeier, N., Trappmann, L., Zaganjori,  
519 M., Ersoezlue, E., Morenas-Rodriguez, E., Guersel, S., Burow, L., Kurz,  
520 C., Haeckert, J., Tatò, M., Utecht, J., Papazov, B., Pogarell, O., Janowitz,  
521 D., Buerger, K., Ewers, M., Palleis, C., . . . Perneczky, R. (2022). Mi-  
522 croglial activation and connectivity in Alzheimer disease and aging. *Annals*  
523 *of Neurology*, 92(5), 768–781. <https://doi.org/10.1002/ana.26465>
- 524 [10] Georgiadis, F., Larivière, S., Glahn, D., Hong, L. E., Kochunov, P.,  
525 Mowry, B., Loughland, C., Pantelis, C., Henskens, F. A., Green, M. J.,  
526 Cairns, M. J., Michie, P. T., Rasser, P. E., Catts, S., Tooney, P., Scott,

- 527 R. J., Schall, U., Carr, V., Quidé, Y., . . . Kirschner, M. (2024). Con-  
528 nectome architecture shapes large-scale cortical alterations in schizophre-  
529 nia: a worldwide ENIGMA study. *Molecular Psychiatry*, 29(6), 1869–1881.  
530 <https://doi.org/10.1038/s41380-024-02442-7>
- 531 [11] Winkler, F., Venkatesh, H. S., Amit, M., Batchelor, T., Demir, I.  
532 E., Deneen, B., Gutmann, D. H., Hervey-Jumper, S., Kuner, T.,  
533 Mabbott, D., Platten, M., Rolls, A., Sloan, E. K., Wang, T. C.,  
534 Wick, W., Venkataramani, V., & Monje, M. (2023). Cancer neuro-  
535 science: State of the field, emerging directions. *Cell*, 186(8), 1689–1707.  
536 <https://doi.org/10.1016/j.cell.2023.02.002>
- 537 [12] Hausmann, D., Hoffmann, D. C., Venkataramani, V., Jung, E., Horschitz,  
538 S., Tetzlaff, S. K., Jabali, A., Hai, L., Kessler, T., Azořin, D. D., Weil,  
539 S., Kourtesakis, A., Sievers, P., Habel, A., Breckwoldt, M. O., Karreman,  
540 M. A., Ratliff, M., Messmer, J. M., Yang, Y., . . . Winkler, F. (2022).  
541 Autonomous rhythmic activity in glioma networks drives brain tumour  
542 growth. *Nature*, 613(7942), 179–186. [https://doi.org/10.1038/s41586-022-](https://doi.org/10.1038/s41586-022-05520-4)  
543 [05520-4](https://doi.org/10.1038/s41586-022-05520-4)
- 544 [13] Salvalaggio, A., Pini, L., Bertoldo, A., & Corbetta, M. (2024). Glioblas-  
545 toma and brain connectivity: the need for a paradigm shift. *The Lancet*  
546 *Neurology*, 23(7), 740–748. [https://doi.org/10.1016/s1474-4422\(24\)00160-1](https://doi.org/10.1016/s1474-4422(24)00160-1)
- 547 [14] Rogers, B. P., Morgan, V. L., Newton, A. T., & Gore, J. C.  
548 (2007b). Assessing functional connectivity in the human brain  
549 by fMRI. *Magnetic Resonance Imaging*, 25(10), 1347–1357.  
550 <https://doi.org/10.1016/j.mri.2007.03.007>
- 551 [15] Duncan, N., & Northoff, G. (2013). Overview of potential procedu-  
552 ral and participant- related confounds for neuroimaging of the rest-

- 553 ing state. *Journal of Psychiatry and Neuroscience*, 38(2), 84–96.  
554 <https://doi.org/10.1503/jpn.120059>
- 555 [16] Mueller, S., Wang, D., Fox, M. D., Yeo, B. T., Sepulcre, J., Sabuncu,  
556 M. R., Shafee, R., Lu, J., & Liu, H. (2013). Individual variability in  
557 functional connectivity architecture of the human brain. *Neuron*, 77(3),  
558 586–595. <https://doi.org/10.1016/j.neuron.2012.12.028>
- 559 [17] Mennes, M., Biswal, B. B., Castellanos, F. X., & Milham, M. P. (2012).  
560 Making data sharing work: The FCP/INDI experience. *NeuroImage*, 82,  
561 683–691. <https://doi.org/10.1016/j.neuroimage.2012.10.064>
- 562 [18] Chamberland, M., Genc, S., Tax, C. M. W., Shastin, D., Koller, K., Raven,  
563 E. P., Cunningham, A., Doherty, J., Van Den Bree, M. B. M., Parker, G.  
564 D., Hamandi, K., Gray, W. P., & Jones, D. K. (2021). Detecting microstruc-  
565 tural deviations in individuals with deep diffusion MRI tractometry. *Nature*  
566 *Computational Science*, 1(9), 598–606. [https://doi.org/10.1038/s43588-](https://doi.org/10.1038/s43588-021-00126-8)  
567 [021-00126-8](https://doi.org/10.1038/s43588-021-00126-8)
- 568 [19] Nugent, S., Croteau, E., Potvin, O., Castellano, C., Dieumegarde, L., Cun-  
569 nane, S. C., & Duchesne, S. (2020). Selection of the optimal intensity nor-  
570 malization region for FDG-PET studies of normal aging and Alzheimer’s  
571 disease. *Scientific Reports*, 10(1). [https://doi.org/10.1038/s41598-020-](https://doi.org/10.1038/s41598-020-65957-3)  
572 [65957-3](https://doi.org/10.1038/s41598-020-65957-3)
- 573 [20] López-González, F. J., Silva-Rodríguez, J., Paredes-Pacheco, J., Niñerola-  
574 Baizán, A., Efthimiou, N., Martín-Martín, C., Moscoso, A., Ruibal,  
575 Á., Roé-Vellvé, N., & Aguiar, P. (2020). Intensity normalization  
576 methods in brain FDG-PET quantification. *NeuroImage*, 222, 117229.  
577 <https://doi.org/10.1016/j.neuroimage.2020.117229>

- 578 [21] Arksey, H., & O'Malley, L. (2005). Scoping studies: towards a method-  
579 ological framework. *International Journal of Social Research Methodology*,  
580 8(1), 19–32. <https://doi.org/10.1080/1364557032000119616>
- 581 [22] Levac, D., Colquhoun, H., & O'Brien, K. K. (2010). Scoping  
582 studies: advancing the methodology. *Implementation Science*, 5(1).  
583 <https://doi.org/10.1186/1748-5908-5-69>
- 584 [23] Tricco, A. C., Lillie, E., Zarin, W., O'Brien, K. K., Colquhoun, H., Levac,  
585 D., Moher, D., Peters, M. D., Horsley, T., Weeks, L., Hempel, S., Akl,  
586 E. A., Chang, C., McGowan, J., Stewart, L., Hartling, L., Aldcroft, A.,  
587 Wilson, M. G., Garritty, C., . . . Straus, S. E. (2018). PRISMA Extension  
588 for Scoping Reviews (PRISMA-SCR): Checklist and explanation. *Annals*  
589 *of Internal Medicine*, 169(7), 467–473. <https://doi.org/10.7326/m18-0850>
- 590 [24] Harzing, A.W. (2007) Publish or Perish, available from  
591 <https://harzing.com/resources/publish-or-perish>
- 592 [25] McKinney, W. (2010). Data structures for statistical computing in  
593 Python. *Proceedings of the Python in Science Conferences*, 56–61.  
594 <https://doi.org/10.25080/majora-92bf1922-00a>
- 595 [26] Harris, C. R., Millman, K. J., Van Der Walt, S. J., Gommers, R., Virta-  
596 nen, P., Cournapeau, D., Wieser, E., Taylor, J., Berg, S., Smith, N. J.,  
597 Kern, R., Picus, M., Hoyer, S., Van Kerkwijk, M. H., Brett, M., Hal-  
598 dane, A., Del Río, J. F., Wiebe, M., Peterson, P., . . . Oliphant, T.  
599 E. (2020). Array programming with NumPy. *Nature*, 585(7825), 357–362.  
600 <https://doi.org/10.1038/s41586-020-2649-2>
- 601 [27] Your connected workspace for wiki, docs & projects — Notion. (04.12.24).  
602 Notion. <https://www.notion.so/>

- 603 [28] ISO 16290:2013. (04.12.24). ISO. <https://www.iso.org/standard/56064.html>
- 604 [29] Research and innovation. (04.12.24). European Commission.  
605 [https://ec.europa.eu/research/participants/data/ref/h2020/  
606 other/wp/2018-2020/annexes/h2020-wp1820-annex-g-tr1\\_en.pdf](https://ec.europa.eu/research/participants/data/ref/h2020/other/wp/2018-2020/annexes/h2020-wp1820-annex-g-tr1_en.pdf)
- 607 [30] Nenning, K., Furtner, J., Kiesel, B., Schwartz, E., Roetzer, T., Fortelny,  
608 N., Bock, C., Grisold, A., Marko, M., Leutmezer, F., Liu, H., Golland,  
609 P., Stoecklein, S., Hainfellner, J. A., Kasprian, G., Prayer, D., Marosi, C.,  
610 Widhalm, G., Woehrer, A., & Langs, G. (2020). Distributed changes of the  
611 functional connectome in patients with glioblastoma. *Scientific Reports*,  
612 10(1). <https://doi.org/10.1038/s41598-020-74726-1>
- 613 [31] Stoecklein, V. M., Stoecklein, S., Galiè, F., Ren, J., Schmutzer, M., Unter-  
614 rainer, M., Albert, N. L., Kreth, F., Thon, N., Liebig, T., Ertl-Wagner, B.,  
615 Tonn, J., & Liu, H. (2020). Resting-state fMRI detects alterations in whole  
616 brain connectivity related to tumor biology in glioma patients. *Neuro-*  
617 *Oncology*, 22(9), 1388–1398. <https://doi.org/10.1093/neuonc/noaa044>
- 618 [32] Stoecklein, S., Wunderlich, S., Papazov, B., Winkelmann, M., Kunz, W.  
619 G., Mueller, K., Ernst, K., Stoecklein, V. M., Blumenberg, V., Karsch-  
620 nia, P., Bücklein, V. L., Rejeski, K., Schmidt, C., Von Bergwelt-Baildon,  
621 M., Tonn, J., Ricke, J., Liu, H., Remi, J., Subklewe, M., . . . Schoeberl,  
622 F. (2023). Functional connectivity MRI provides an imaging correlate for  
623 chimeric antigen receptor T-cell-associated neurotoxicity. *Neuro-Oncology*  
624 *Advances*, 5(1). <https://doi.org/10.1093/noajnl/vdad135>
- 625 [33] Stoecklein, V., Wunderlich, S., Papazov, B., Thon, N., Schmutzer, M.,  
626 Schinner, R., Zimmermann, H., Liebig, T., Ricke, J., Liu, H., Tonn, J.,  
627 Schichor, C., & Stoecklein, S. (2023). Perifocal Edema in Patients with

- 628 Meningioma is Associated with Impaired Whole-Brain Connectivity as De-  
629 tected by Resting-State fMRI. *American Journal of Neuroradiology*, 44(7),  
630 814–819. <https://doi.org/10.3174/ajnr.a7915>
- 631 [34] Doucet, G. E., Glahn, D. C., & Frangou, S. (2020). Person-based similarity  
632 in brain structure and functional connectivity in bipolar disorder. *Journal of*  
633 *Affective Disorders*, 276, 38–44. <https://doi.org/10.1016/j.jad.2020.06.041>
- 634 [35] West, A., Hamlin, N., Frangou, S., Wilson, T. W., & Doucet, G. E.  
635 (2021). Person-Based Similarity Index for Cognition and its neural cor-  
636 relates in Late Adulthood: Implications for Cognitive Reserve. *Cerebral*  
637 *Cortex*, 32(2), 397–407. <https://doi.org/10.1093/cercor/bhab215>
- 638 [36] Silvestri, E., Moretto, M., Facchini, S., Castellaro, M., Anglani, M., Monai,  
639 E., D’Avella, D., Della Puppa, A., Cecchin, D., Bertoldo, A., & Cor-  
640 betta, M. (2022). Widespread cortical functional disconnection in gliomas:  
641 an individual network mapping approach. *Brain Communications*, 4(2).  
642 <https://doi.org/10.1093/braincomms/fcac082>
- 643 [37] Morgan, V. L., Johnson, G. W., Cai, L. Y., Landman, B. A., Schilling, K.  
644 G., Englot, D. J., Rogers, B. P., & Chang, C. (2021). MRI network progres-  
645 sion in mesial temporal lobe epilepsy related to healthy brain architecture.  
646 *Network Neuroscience*, 5(2), 434–450. [https://doi.org/10.1162/netn\\_a\\_00184](https://doi.org/10.1162/netn_a_00184)
- 647
- 648 [38] Morgan, V. L., Sainburg, L. E., Johnson, G. W., Janson, A., Levine, K.  
649 K., Rogers, B. P., Chang, C., & Englot, D. J. (2022). Presurgical temporal  
650 lobe epilepsy connectome fingerprint for seizure outcome prediction. *Brain*  
651 *Communications*, 4(3). <https://doi.org/10.1093/braincomms/fcac128>
- 652 [39] Guerrero-Gonzalez, J. M., Yeske, B., Kirk, G. R., Bell, M. J., Fer-  
653 razzano, P. A., & Alexander, A. L. (2022). Mahalanobis distance

- 654 tractometry (MaD-Tract) – a framework for personalized white mat-  
655 ter anomaly detection applied to TBI. *NeuroImage*, 260, 119475.  
656 <https://doi.org/10.1016/j.neuroimage.2022.119475>
- 657 [40] Marquand, A. F., Kia, S. M., Zabihi, M., Wolfers, T., Buitelaar, J. K.,  
658 & Beckmann, C. F. (2019). Conceptualizing mental disorders as devia-  
659 tions from normative functioning. *Molecular Psychiatry*, 24(10), 1415–1424.  
660 <https://doi.org/10.1038/s41380-019-0441-1>
- 661 [41] Coyle, D., & Hampton, L. (2023). 21st century progress  
662 in computing. *Telecommunications Policy*, 48(1), 102649.  
663 <https://doi.org/10.1016/j.telpol.2023.102649>
- 664 [42] AMD Technical Information Portal. (04.12.24).  
665 <https://docs.amd.com/v/u/en-US/wp505-versal-acap>
- 666 [43] NVIDIA RTX Series Datasheets. (04.12.24). NVIDIA.  
667 <https://resources.nvidia.com/en-us-briefcase-for-datasheets/>
- 668 [44] R. Okuta, Y. Unno, D. Nishino, S. Hido, and C. Loomis. CuPy: A NumPy-  
669 Compatible Library for NVIDIA GPU Calculations. Proceedings of Work-  
670 shop on Machine Learning Systems (LearningSys) in The Thirty-first An-  
671 nual Conference on Neural Information Processing Systems (NIPS), 2017  
672 [http://learningsys.org/nips17/assets/papers/paper\\_16.pdf](http://learningsys.org/nips17/assets/papers/paper_16.pdf)
- 673 [45] Dask Development Team (2016). Dask: Library for dynamic task schedul-  
674 ing URL <http://dask.pydata.org>
- 675 [46] Alistair Miles, jakirkham, Joe Hamman, Dimitri Papadopoulos Or-  
676 fanos, M Bussonnier, Josh Moore, David Stansby, Davis Bennett, Tom  
677 Augspurger, James Bourbeau, Andrew Fulton, Sanket Verma, Deepak  
678 Cherian, Norman Rzepka, Ryan Abernathey, Gregory Lee, Mads R.

- 679 B. Kristensen, Zain Patel, Saransh Chopra, . . . Shivank Chaudhary.  
680 (2024). zarr-developers/zarr-python: v3.0.0-beta.2 (v3.0.0-beta.2). Zenodo.  
681 <https://doi.org/10.5281/zenodo.14165945>
- 682 [47] Hoyer, S., & Hamman, J. (2017). xarray: N-D labeled Arrays and  
683 Datasets in Python. *Journal of Open Research Software*, 5(1), 10.  
684 <https://doi.org/10.5334/jors.148>
- 685 [48] Matthew-Brett. (04.12.24). GitHub - matthew-brett/xibabel: Pilot-  
686 ing a new image object for neuroimaging based on XArray. GitHub.  
687 <https://github.com/matthew-brett/xibabel>
- 688 [49] Jax-Ml. (04.12.24). GitHub - jax-ml/jax: Composable transformations of  
689 Python+NumPy programs: differentiate, vectorize, JIT to GPU/TPU, and  
690 more. GitHub. <http://github.com/jax-ml/jax>
- 691 [50] Martín Abadi, Ashish Agarwal, Paul Barham, Eugene Brevdo, Zhifeng  
692 Chen, Craig Citro, Greg S. Corrado, Andy Davis, Jeffrey Dean, Matthieu  
693 Devin, Sanjay Ghemawat, Ian Goodfellow, Andrew Harp, Geoffrey Irving,  
694 Michael Isard, Rafal Jozefowicz, Yangqing Jia, Lukasz Kaiser, Manjunath  
695 Kudlur, Josh Levenberg, Dan Mané, Mike Schuster, Rajat Monga, Sherry  
696 Moore, Derek Murray, Chris Olah, Jonathon Shlens, Benoit Steiner, Ilya  
697 Sutskever, Kunal Talwar, Paul Tucker, Vincent Vanhoucke, Vijay Vasude-  
698 van, Fernanda Viégas, Oriol Vinyals, Pete Warden, Martin Wattenberg,  
699 Martin Wicke, Yuan Yu, and Xiaoqiang Zheng. TensorFlow: Large-scale  
700 machine learning on heterogeneous systems, 2015. <https://tensorflow.org>.
- 701 [51] Paszke, A., Gross, S., Massa, F., Lerer, A., Bradbury, J., Chanan, G.,  
702 Killeen, T., Lin, Z., Gimelshein, N., Antiga, L., Desmaison, A., Köpf,  
703 A., Yang, E., DeVito, Z., Raison, M., Tejani, A., Chilamkurthy, S.,  
704 Steiner, B., Fang, L., . . . Chintala, S. (2019). PyTorch: An Imperative



- 705 Style, High-Performance Deep Learning Library. arXiv (Cornell Univer-  
706 sity). <https://doi.org/10.48550/arxiv.1912.01703>
- 707 [52] David C. Van Essen, Stephen M. Smith, Deanna M. Barch, Timothy E.J.  
708 Behrens, Essa Yacoub, Kamil Ugurbil, for the WU-Minn HCP Consor-  
709 tium. (2013). The WU-Minn Human Connectome Project: An overview.  
710 *NeuroImage* 80(2013):62-79.
- 711 [53] Petersen, R. C., Aisen, P. S., Beckett, L. A., Donohue, M. C., Gamst,  
712 A. C., Harvey, D. J., Jack, C. R., Jagust, W. J., Shaw, L. M.,  
713 Toga, A. W., Trojanowski, J. Q., & Weiner, M. W. (2009). Alzheimer’s  
714 Disease Neuroimaging Initiative (ADNI). *Neurology*, 74(3), 201–209.  
715 <https://doi.org/10.1212/wnl.0b013e3181cb3e25>
- 716 [54] Holmes, A. J., Hollinshead, M. O., O’Keefe, T. M., Petrov, V. I., Fariello,  
717 G. R., Wald, L. L., Fischl, B., Rosen, B. R., Mair, R. W., Roffman, J.  
718 L., Smoller, J. W., & Buckner, R. L. (2015). Brain Genomics Superstruct  
719 Project initial data release with structural, functional, and behavioral mea-  
720 sures. *Scientific Data*, 2(1). <https://doi.org/10.1038/sdata.2015.31>
- 721 [55] OpenNeuro. (04.12.24). <https://openneuro.org/>
- 722 [56] Farras-Permanyer, L., Mancho-Fora, N., Montalà-Flaquer, M., Bartrés-Faz,  
723 D., Vaqué-Alcázar, L., Peró-Cebollero, M., & Guàrdia-Olmos, J. (2019).  
724 Age-related changes in resting-state functional connectivity in older adults.  
725 *Neural Regeneration Research*, 14(9), 1544. <https://doi.org/10.4103/1673-5374.255976>
- 727 [57] Geerligs, L., Renken, R. J., Saliassi, E., Maurits, N. M., &  
728 Lorist, M. M. (2014). A Brain-Wide study of Age-Related changes  
729 in functional connectivity. *Cerebral Cortex*, 25(7), 1987–1999.  
730 <https://doi.org/10.1093/cercor/bhu012>

- 731 [58] Andrews-Hanna, J. R., Snyder, A. Z., Vincent, J. L., Lustig, C.,  
732 Head, D., Raichle, M. E., & Buckner, R. L. (2007). Disruption of  
733 Large-Scale brain systems in advanced aging. *Neuron*, 56(5), 924–935.  
734 <https://doi.org/10.1016/j.neuron.2007.10.038>
- 735 [59] David, S. P., Naudet, F., Laude, J., Radua, J., Fusar-Poli, P., Chu,  
736 I., Stefanick, M. L., & Ioannidis, J. P. A. (2018). Potential reporting  
737 bias in neuroimaging studies of sex differences. *Scientific Reports*, 8(1).  
738 <https://doi.org/10.1038/s41598-018-23976-1>
- 739 [60] Ryali, S., Zhang, Y., De Los Angeles, C., Supekar, K., & Menon,  
740 V. (2024). Deep learning models reveal replicable, generalizable, and  
741 behaviorally relevant sex differences in human functional brain orga-  
742 nization. *Proceedings of the National Academy of Sciences*, 121(9).  
743 <https://doi.org/10.1073/pnas.2310012121>
- 744 [61] Chen, A. A., Srinivasan, D., Pomponio, R., Fan, Y., Nasrallah, I. M.,  
745 Resnick, S. M., Beason-Held, L. L., Davatzikos, C., Satterthwaite, T. D.,  
746 Bassett, D. S., Shinohara, R. T., & Shou, H. (2022). Harmonizing functional  
747 connectivity reduces scanner effects in community detection. *NeuroImage*,  
748 256, 119198. <https://doi.org/10.1016/j.neuroimage.2022.119198>
- 749 [62] Mueller, S., Wang, D., Fox, M. D., Pan, R., Lu, J., Li, K., Sun, W.,  
750 Buckner, R. L., & Liu, H. (2015). Reliability correction for functional con-  
751 nectivity: Theory and implementation. *Human Brain Mapping*, 36(11),  
752 4664–4680. <https://doi.org/10.1002/hbm.22947>
- 753 [63] Henschel, L., Conjeti, S., Estrada, S., Diers, K., Fischl, B.,  
754 & Reuter, M. (2020). FastSurfer - A fast and accurate deep  
755 learning based neuroimaging pipeline. *NeuroImage*, 219, 117012.  
756 <https://doi.org/10.1016/j.neuroimage.2020.117012>

- 757 [64] Hoffmann, M., Hoopes, A., Greve, D. N., Fischl, B., & Dalca, A. V.  
758 (2024). Anatomy-aware and acquisition-agnostic joint registration with  
759 SynthMorph. *Imaging Neuroscience*, 2, 1–33. [https://doi.org/10.1162/](https://doi.org/10.1162/imag_a_00197)  
760 [imag\\_a\\_00197](https://doi.org/10.1162/imag_a_00197)
- 761 [65] Ren, J., An, N., Lin, C., Zhang, Y., Sun, Z., Zhang, W., Li, S., Guo,  
762 N., Cui, W., Hu, Q., Wang, W., Wu, X., Wang, Y., Jiang, T., Satterthwaite,  
763 T. D., Wang, D., & Liu, H. (2024). DeepPrep: An accelerated, scalable,  
764 and robust pipeline for neuroimaging preprocessing empowered by deep  
765 learning. *bioRxiv* (Cold Spring Harbor Laboratory).  
766 <https://doi.org/10.1101/2024.03.06.581108>

767 99
